# Supplementary material for: Rational design of drug-eluting stents via electrospray and in vivo evaluation of preventing oesophageal stricture
Source: Royal Society of Chemistry journal article supplement (doi:10.1039/c4ra01300j), 2014-01-01
Supplement: c4ra01300j1.pdf [file c4ra01300j1.pdf]

## Supporting Information

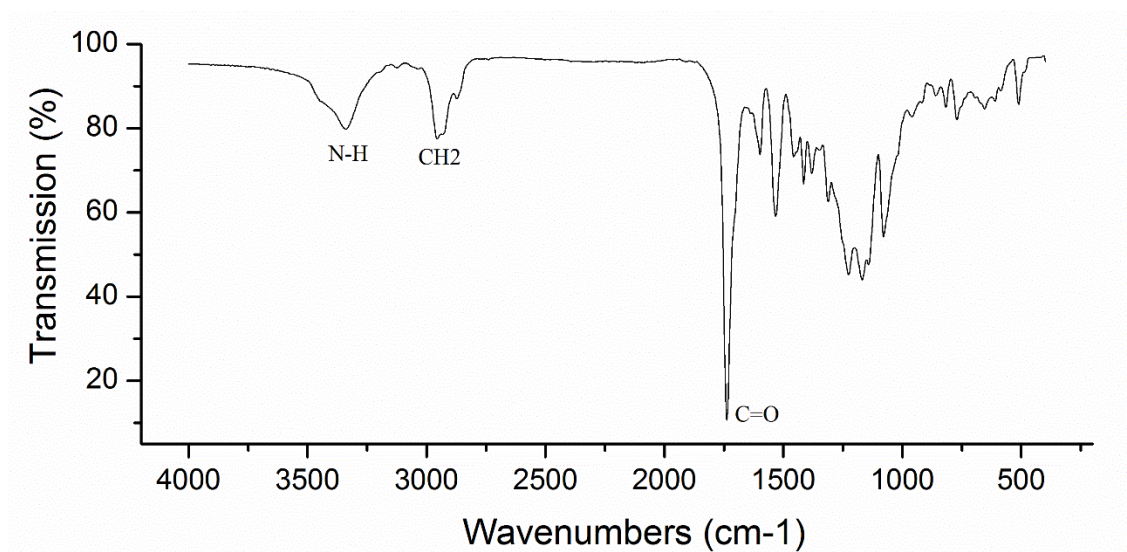

Figure S1. FT-IR of polyurethanes. IR spectrum was required by Nexus 870 FT-IR (Nicolet, USA).

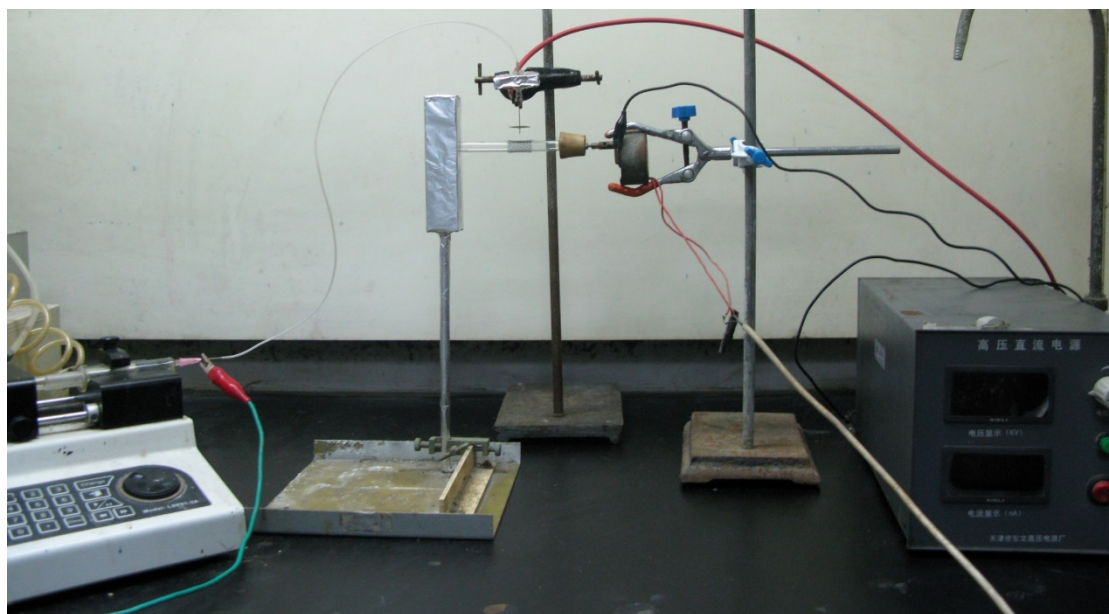

Figure S2. Self-designed electrospray system. Detailed illustration of component was explained in Figure 1.

Table S1. Uniformity of paclitaxel-coating prepared by electrospray. (n=3) The loading percentage is calculated by drug amount dividing polyurethane weight. For all products, theoretical polymer weight was 30mg.

| Theoretical Loading (wt. %) |         | 3%         | 5%         | 10%        | 20%         |
|-----------------------------|---------|------------|------------|------------|-------------|
| Actual                      | Results | 3.05±0.05% | 4.78±0.21% | 9.97±0.17% | 19.40±0.68% |
| (wt. %)                     |         |            |            |            |             |

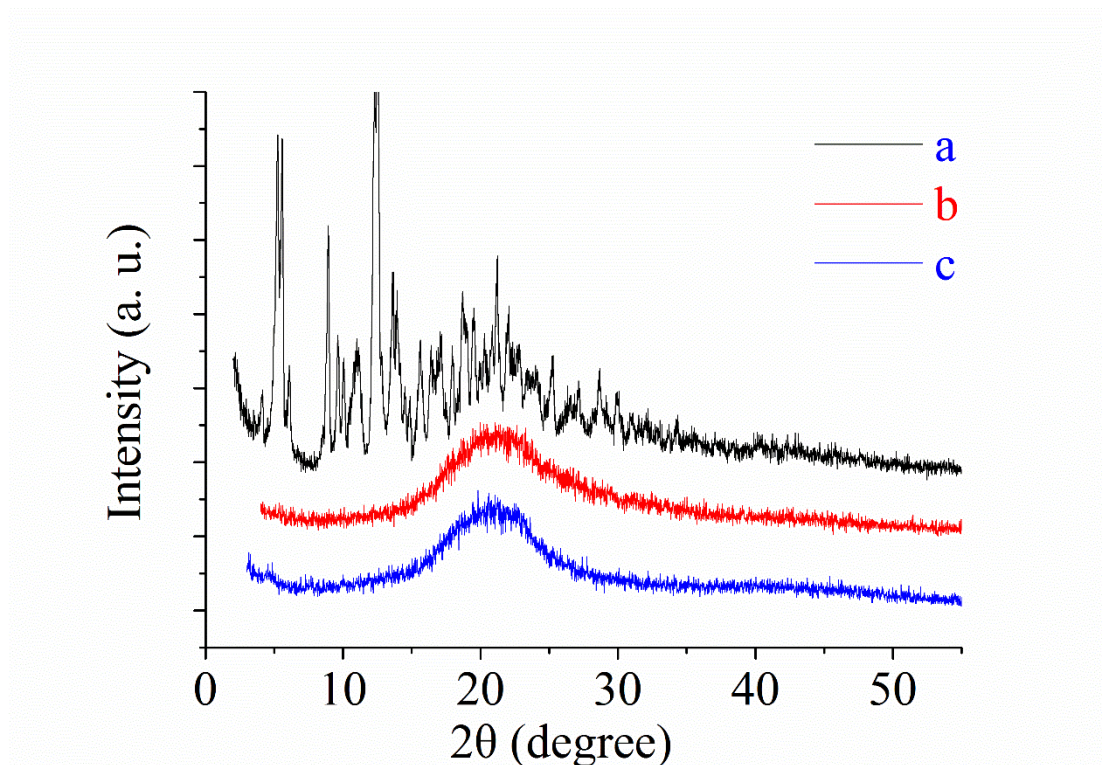

Figure S3. X-ray diffraction patterns of paclitaxel (a), polyurethane (b), 10% drug-loading film (c). Paclitaxel was dispersed in the amorphous state among the film.

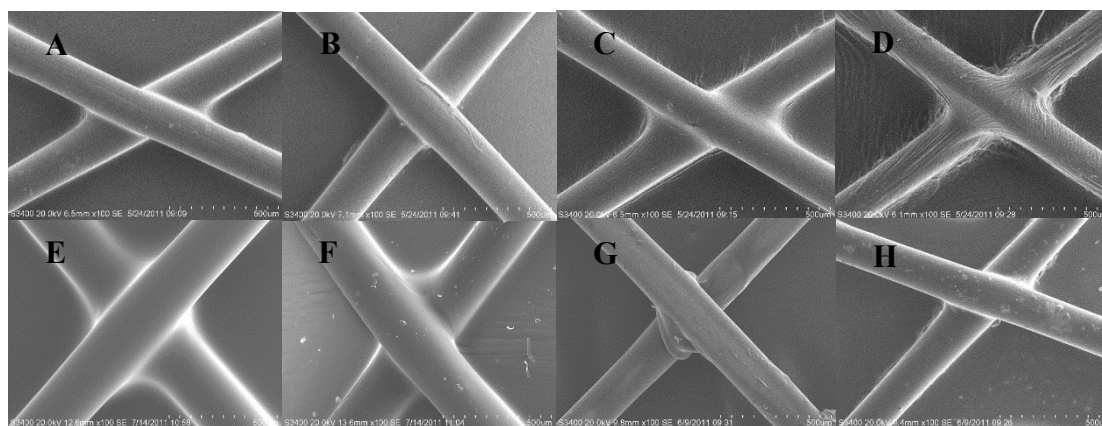

Figure S4. Surface morphologies of different paclitaxel-loading stent (intersection area of struts) before and after drug release (100×): film 30mg-0%, 15mg-10%, 30mg-10%, 30mg-20% respectively before release (A, C, E, G); corresponding results after 5-day release (B, D, F, H).

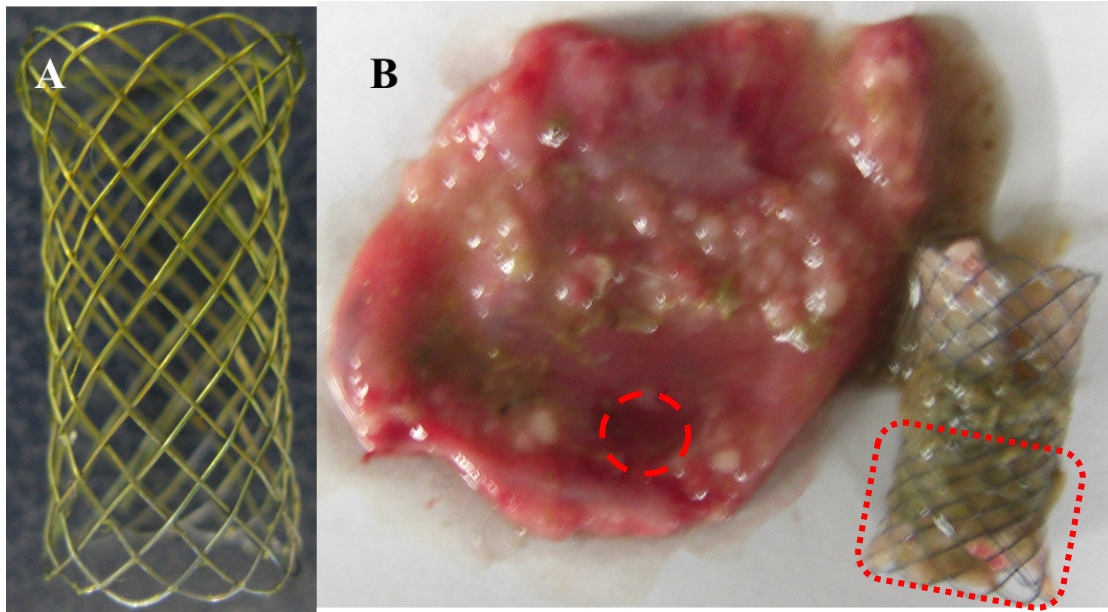

Figure S5. Drug-eluting stent with only coating of struts and the anti-hyperplasia effect *in vivo*. (A) 5mg polyurethane-coating on stent struts. Curcumin (yellow) was used as the indicator to show the performance. (B) The lower section of stent was coated with 5mg PUs-10% paclitaxel on struts (rectangle). After 1 week, the upper bare stent induced serve tissue granulation, while paclitaxel effectively inhibited tissue hyperplasia in the adjacent section. Haemorrhage also occurred (circle).
